# Supplementary material for: Proteome Profile Changes Induced by Heterologous Overexpression of Mycobacterium tuberculosis-Derived Antigens PstS-1 (Rv0934) and Ag85B (Rv1886c) in Mycobacterium microti
Source: MDPI journal article supplement (doi:10.3390/biom12121836), 2022-12-08
Supplement: s1 [file s1]

A)

CLUSTAL O (1.2.4) multiple sequence alignment

Rv0934 (PstS-1)

|                        |                                                               |     |
|------------------------|---------------------------------------------------------------|-----|
| <i>M. microti</i>      | MKIRLHTLLAVLTAAPLLLLAAGCGSKPPSGSPETGAGAGTVATTPASSPVTLAETGSTL  | 60  |
| <i>M. tuberculosis</i> | MKIRLHTLLAVLTAAPLLLLAAGCGSKPPSGSPETGAGAGTVATTPASSPVTLAETGSTL  | 60  |
| *****                  |                                                               |     |
| <i>M. microti</i>      | LYPLFNLWGPAFHERYPNVTITAQGTGSGAGIAQAAAGTVNIGASDAYLSEGDMAAHKGL  | 120 |
| <i>M. tuberculosis</i> | LYPLFNLWGPAFHERYPNVTITAQGTGSGAGIAQAAAGTVNIGASDAYLSEGDMAAHKGL  | 120 |
| *****                  |                                                               |     |
| <i>M. microti</i>      | MNIALAISAQVNYNLPGVSEHLKLNKVLAAAMYQGTIKTWDDPQIAALNPGVNLPGTAV   | 180 |
| <i>M. tuberculosis</i> | MNIALAISAQVNYNLPGVSEHLKLNKVLAAAMYQGTIKTWDDPQIAALNPGVNLPGTAV   | 180 |
| *****                  |                                                               |     |
| <i>M. microti</i>      | VPLHRSDGSGDTFLFTQYLSKQDPEGWGKSPGFGTTVDFAVPFALGGENGGMTGCAE     | 240 |
| <i>M. tuberculosis</i> | VPLHRSDGSGDTFLFTQYLSKQDPEGWGKSPGFGTTVDFAVPFALGGENGGMTGCAE     | 240 |
| *****                  |                                                               |     |
| <i>M. microti</i>      | TPGCVAYIGISFLDQASQRLGGEAQLGNSSGNFLLPDAQSIQAAAAGFASKTPANQAISM  | 300 |
| <i>M. tuberculosis</i> | TPGCVAYIGISFLDQASQRLGGEAQLGNSSGNFLLPDAQSIQAAAAGFASKTPANQAISM  | 300 |
| *****                  |                                                               |     |
| <i>M. microti</i>      | IDGPAPDGYPIINYEYAIVNNRQKDAATAQTLQAFHLHWAITDGNKASFLDQAHFQPLPPA | 360 |
| <i>M. tuberculosis</i> | IDGPAPDGYPIINYEYAIVNNRQKDAATAQTLQAFHLHWAITDGNKASFLDQVHFQPLPPA | 360 |
| *****                  |                                                               |     |
| <i>M. microti</i>      | VVKLSDALIATISS* 374                                           |     |
| <i>M. tuberculosis</i> | VVKLSDALIATISS* 374                                           |     |
| *****                  |                                                               |     |

B)

CLUSTAL O (1.2.4) multiple sequence alignment

Rv1886c (Ag85B)

|                        |                                                              |     |
|------------------------|--------------------------------------------------------------|-----|
| <i>M. microti</i>      | MTDVSRKIRAWGRRMIGTAAAVLPLGLVGLAGGAATAGAFSRPGLPVEYLQVPSMGR    | 60  |
| <i>M. tuberculosis</i> | MTDVSRKIRAWGRRMIGTAAAVLPLGLVGLAGGAATAGAFSRPGLPVEYLQVPSMGR    | 60  |
| *****                  |                                                              |     |
| <i>M. microti</i>      | DIKVQFQSGGNNSPAVYLLDGLRAQDDYNGWDINTPAFEWYYQSGLSIVMPVGGQSSFY  | 120 |
| <i>M. tuberculosis</i> | DIKVQFQSGGNNSPAVYLLDGLRAQDDYNGWDINTPAFEWYYQSGLSIVMPVGGQSSFY  | 120 |
| *****                  |                                                              |     |
| <i>M. microti</i>      | DWYSPACGKAGCQTYKWETFLTSELPQWLSANRAVKPTGSAAGLSMAGSSAMILAAYHP  | 180 |
| <i>M. tuberculosis</i> | DWYSPACGKAGCQTYKWETFLTSELPQWLSANRAVKPTGSAAGLSMAGSSAMILAAYHP  | 180 |
| *****                  |                                                              |     |
| <i>M. microti</i>      | QQFIYAGSLSALLDPSQGMGPSLIGLAMGDAGGYKAADMWGPSSDPAWERNDPTQQIPKL | 240 |
| <i>M. tuberculosis</i> | QQFIYAGSLSALLDPSQGMGPSLIGLAMGDAGGYKAADMWGPSSDPAWERNDPTQQIPKL | 240 |
| *****                  |                                                              |     |
| <i>M. microti</i>      | VANNTRLWVYCGNGTPNELGGANIPAEFLENFVRSSNLKFQDAYNAAGGHNAVFNPNG   | 300 |
| <i>M. tuberculosis</i> | VANNTRLWVYCGNGTPNELGGANIPAEFLENFVRSSNLKFQDAYNAAGGHNAVFNPNG   | 300 |
| *****                  |                                                              |     |
| <i>M. microti</i>      | THSWEYWGQQLNAMKGDLQSSLGAG* 325                               |     |
| <i>M. tuberculosis</i> | THSWEYWGQQLNAMKGDLQSSLGAG* 325                               |     |
| *****                  |                                                              |     |

**Figure S1.** Protein sequence translation and alignments of genes A) Rv0934 and B) Rv1886c from strains *M. microti* and *M. tuberculosis* used in this study.

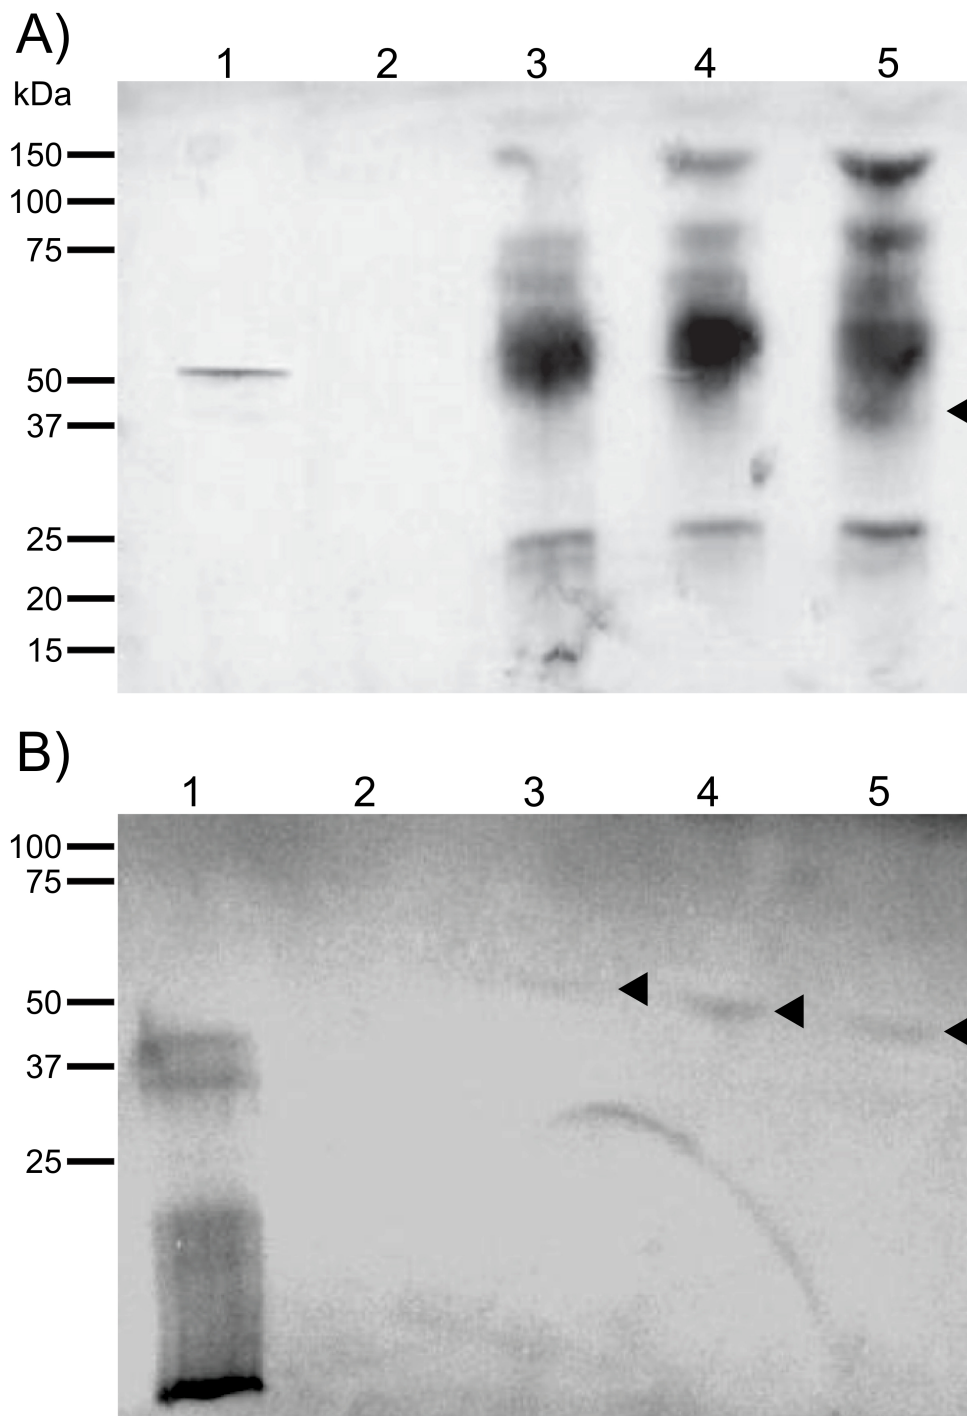

**Figure S2.** Differential expression and glycosylation of proteins from wild-type and recombinant *M. microti* strains. A) Mannose lectin blot, B) Sialic acid lectin blot.

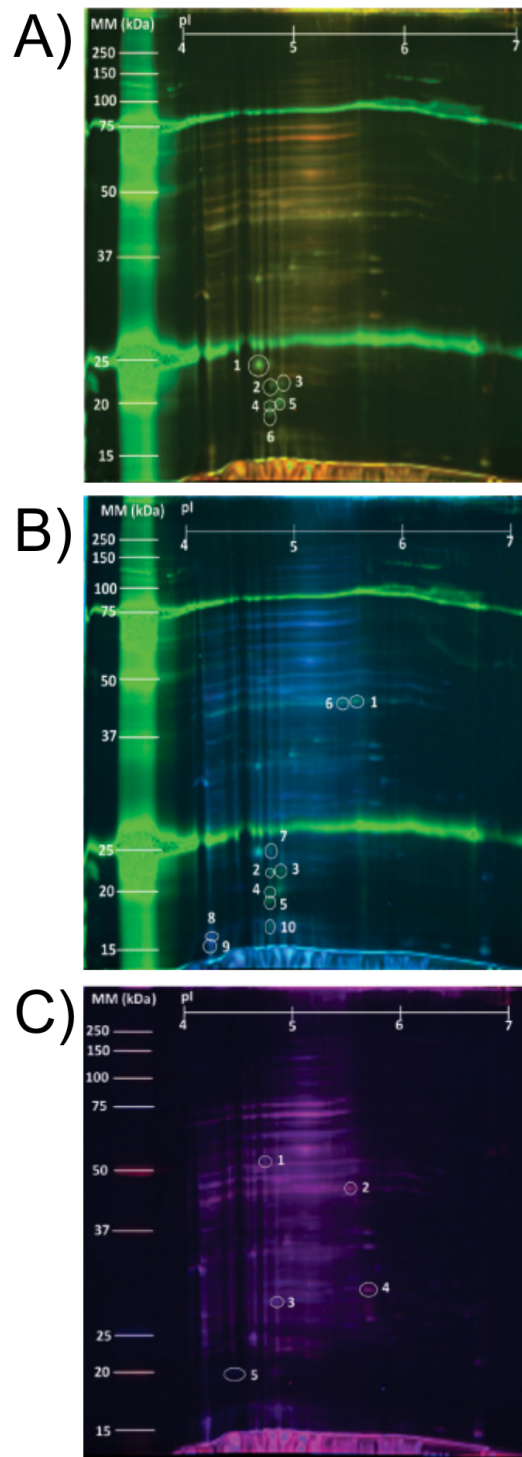

**Figure S3.** Two-dimensional fluorescence difference gel electrophoresis with labelled proteins from the cell extract of A) *M. microti* vs. *M. microti*-PstS-1, B) *M. microti* vs. *M. microti*-AG85B and C) *M. microti*-PstS-1 vs. *M. microti*-Ag85B.
